# Supplementary material
Source: publisher figshare collection journal article supplement (https://gsapubs.figshare.com/ndownloader/files/22739801)
Supplement: Supplementary file 1 [file 22739801]

Table A

TABLE A. FIELD CHARACTERISTICS FOR TOP-STRATUM FACIES OF THE ALLUVIAL FORMATIONS.  
TEXTURES ACCORDING TO SOIL SURVEY STAFF (1979).

| Unit                      | Munsell Colors                                 |                                      | Textures                            | Pedogenic *                                         |                                                                                   | Other components |
|---------------------------|------------------------------------------------|--------------------------------------|-------------------------------------|-----------------------------------------------------|-----------------------------------------------------------------------------------|------------------|
|                           | Moist                                          | Dry                                  |                                     | structure development                               |                                                                                   |                  |
| <u>Holocene</u>           |                                                |                                      |                                     |                                                     |                                                                                   |                  |
| Sowell Mill formation     | 10YR4/3, 4/4<br>brown                          | 10YR5-6/3-4<br>light yellowish-      | Massive silt or<br>interbedded silt | Medium rounded<br>blocky or                         | Abundant medium to coarse<br>charcoal in lower portions                           |                  |
| TO                        |                                                | brown, pale<br>brown                 | and sandy loam                      | absent                                              | coarse charcoal, twigs, leaf<br>mats, and historic artifacts<br>in upper portions |                  |
| <u>Leftwich formation</u> |                                                |                                      |                                     |                                                     |                                                                                   |                  |
| Upper member              | 10YR4/3, 3/2                                   | 7.5YR5/4,                            | Massive silty clay                  | Coarse prismatic,                                   | Common medium charcoal,                                                           |                  |
| T1b3, T1b2                | dark brown                                     | 10YR4/3, 5/3<br>dark brown,<br>brown |                                     | parting to medium<br>prismatic or<br>angular blocky | ceramic potsherds                                                                 |                  |
| Lower member              | 7.5YR, 10 YR                                   | 10YR5/4+                             | Massive silty                       | Medium prismatic,                                   | Common medium charcoal,                                                           |                  |
| T1b1                      | 3/3, 3/4 dark<br>brown; 7.5YR<br>4/2-4/4 brown | yellowish-brown                      | clay to silty<br>clay loam          | parting to<br>angular blocky                        | Archaic period chert<br>artifacts                                                 |                  |

Cannon Bend

formation

|              |                 |                  |                    |                   |                          |
|--------------|-----------------|------------------|--------------------|-------------------|--------------------------|
| Upper member | 7.5YR3-4/6      | 10YR5/4          | Massive silty clay | Medium prismatic  | Dispersed fine charcoal, |
| T1a2         | brown           | yellowish-       | loam to clayey     | parting to        | rare early Archaic       |
|              |                 | brown (matrix),  | silt or fine sand  | angular blocky    | Period chert artifacts   |
|              |                 | 7.5 YR5//4 brown |                    |                   |                          |
|              |                 | (clay skins)     |                    |                   |                          |
| Lower member | 10YR4/3 dark    | 10YR6/2 light    | Massive clay loam  | Coarse prismatic  | Rare charcoal, thin      |
| T1a1         | yellowish-      | yellowish-       |                    | parting to        | manganese                |
|              | brown (matrix), | brown (matrix),  |                    | medium subangular | hydroxide coatings       |
|              | 7.5YR4/4 brown  | 7.5YR5/4 brown   |                    | blocky            |                          |
|              | (clay skins)    | (clay skins)     |                    |                   |                          |

Pleistocene

Cheek Bend

formation

|              |               |                    |                   |                  |                             |
|--------------|---------------|--------------------|-------------------|------------------|-----------------------------|
| Upper member | 10YR5/4       | 10YR6/4 light      | Pebbly silty clay | Medium prismatic | Charcoal not present,       |
| T2b          | yellowish-    | yellowish-         |                   |                  | PaleoIndian(?)              |
|              | brown and     | brown, 10YR7/3     |                   |                  | chert artifacts at top      |
|              | 10YR4/4 brown | very pale brown,   |                   |                  | of and within unit,         |
|              | (mottled)     | and 7.5YR5/4 brown |                   |                  | common thin manganese       |
|              |               | (mottled)          |                   |                  | hydroxide coatings and fine |
|              |               |                    |                   |                  | nodules                     |

|              |                              |                      |                                   |    |                                                                                            |
|--------------|------------------------------|----------------------|-----------------------------------|----|--------------------------------------------------------------------------------------------|
| Lower member | 7.5YR4/6, 5/8                | 7.5YR5/6 strong      | Massive silty clay                | .. | Charcoal not present, arti-                                                                |
| T2a          | strong brown<br>and 10YR6/6, | brown and<br>10YR6/6 | loam to clayey<br>silt, fine sand |    | facts not present, scattered<br>1-3 m thick zones of thick<br>manganese coatings and clots |
|              | 5/4-8 yellowish              | brownish-            |                                   |    |                                                                                            |
|              | brown (mottled)              | yellow (mottled)     |                                   |    |                                                                                            |

\*For alluvium below surface soil horizons.

+Average color. At some localities: 10YR5/6 bright brown silty matrix coated by 5YR3/4, 4/6 reddish-brown clay skins.
